# Supplementary figures and images for: Autoactive Arabidopsis RPS4 alleles require partner protein RRS1-R
Source: Oxford University Press journal article supplement (doi:10.1093/plphys/kiaa076), 2020-12-18

Fig S4

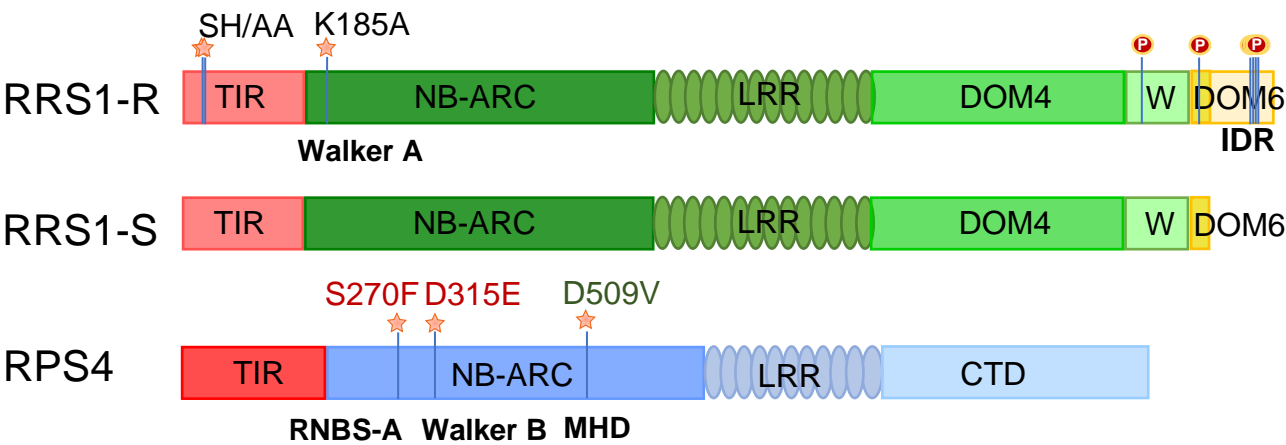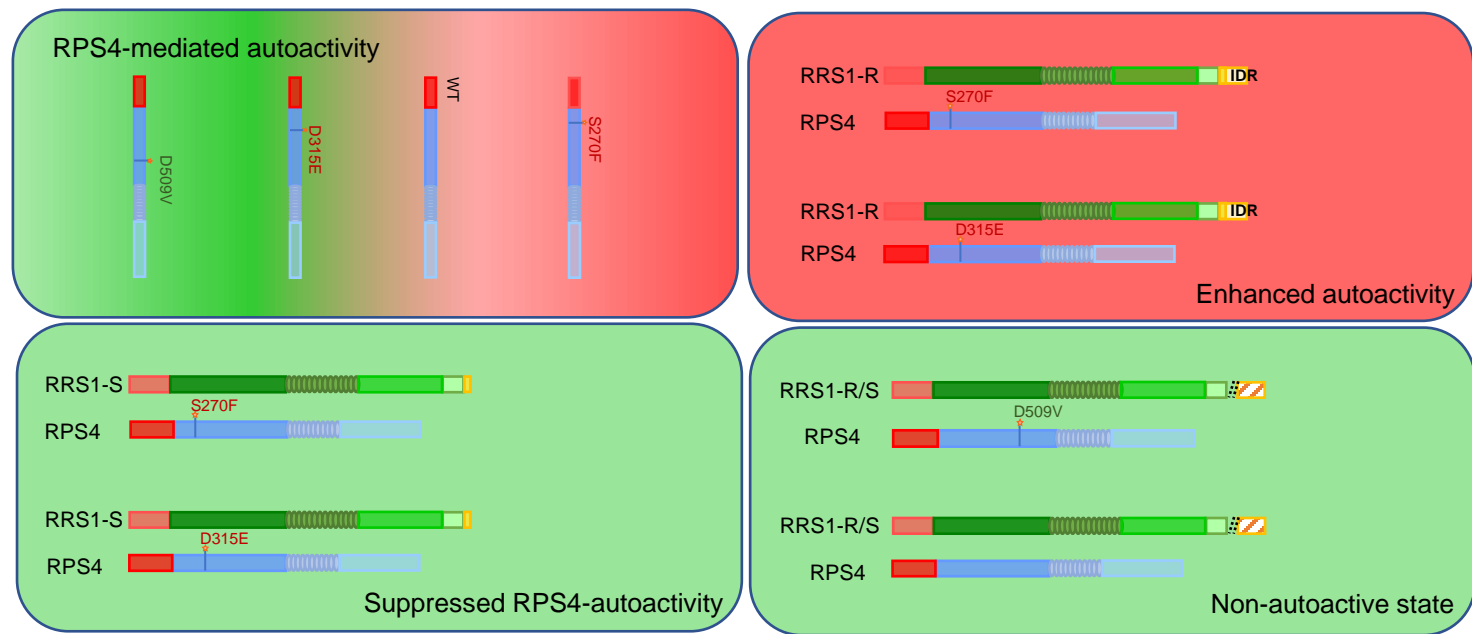

Supplement: kiaa076_supplementary_data.zip [file kiaa076_supplementary_data.zip]
